# Supplementary material
Source: publisher figshare collection journal article supplement (https://sage.figshare.com/ndownloader/files/21301248)
Supplement: Supplementary file 1 [file 21301248]

**Supplemental Material**

**Vagus Nerve Stimulation Paired with Rehabilitative Training Enhances Motor Recovery after Bilateral Spinal Cord Injury to Cervical Forelimb Motor Pools**

Michael J. Darrow1, Miranda Torres2,3, Maria Sosa2,3, Tanya Danaphongse2, Zainab Haider2,3, Robert L. Rennaker2,3, Michael P. Kilgard1,2,3, Seth A. Hays1,2,3,*

*Contents*

1. Supplemental Figure 1: Extent of Damage due to Spinal Cord Injury
2. Supplemental Tables of Data Indexed across Animals
   1. Average Peak Pull Force at Each Week
   2. Hit Rate at Each Week
   3. Cylinder Total Contacts
   4. Grip Strength
   5. Total Trials during Rehabilitative Training

**Supplemental Figure 1: VNS does not influence lesion extent.** (A) Gray matter damage to the left and right hemicord is comparable across groups (Left Hemicord; Two-way repeated measures ANOVA, F[1,8] = 0.28; p = 0.61; Right Hemicord; Two-way repeated measures ANOVA, F[1,8] = 0.04; p = 0.85). (B) White matter damage to the left and right hemicord is comparable across groups (Left Hemicord; Two-way repeated measures ANOVA, F[1,8] = 0.01; p = 0.95; Right Hemicord; Two-way repeated measures ANOVA, F[1,8] = 0.22; p = 0.65). The absence of differences in lesion size indicate that VNS does not confer neuroprotective effects that could account for the differences in recovery. Data represent mean ± SEM.

**Table 1. Average Peak Pull Force at Each Week**

| **Animal ID** | **Group** | **Wk -1** | **Wk 8** | **Wk 9** | **Wk 10** | **Wk 11** | **Wk 12** | **Wk 13** | **Wk 14** |
| --- | --- | --- | --- | --- | --- | --- | --- | --- | --- |
| 1 | Rehab | 147.8 | 38.1 | 32.2 | 56.5 | 68.2 | 89.8 | 108.1 | 110.1 |
| 2 | Rehab | 149.2 | 37.7 | 57.8 | 73.8 | 89.0 | 104.6 | 114.8 | 114.4 |
| 3 | Rehab | 153.5 | 71.7 | 122.3 | 154.4 | 143.3 | 130.9 | 128.9 | 112.6 |
| 4 | Rehab | 151.4 | 75.9 | 92.7 | 126.3 | 109.1 | 85.5 | 73.0 | 82.0 |
| 5 | Rehab | 146.2 | 66.0 | 114.0 | 113.6 | 91.3 | 76.7 | 78.3 | 68.3 |
| 6 | Rehab | 159.0 | 47.0 | 109.6 | 123.6 | 137.0 | 141.6 | 131.6 | 111.6 |
| 7 | Rehab | 139.7 | 56.6 | 63.3 | 87.1 | 120.6 | 132.8 | 120.3 | 115.6 |
| 8 | Rehab | 139.4 | 24.3 | 25.8 | 100.0 | 105.2 | 86.2 | 94.4 | 84.6 |
| 9 | VNS+Rehab | 136.4 | 66.2 | 102.9 | 115.9 | 108.4 | 131.5 | 141.1 | 133.1 |
| 10 | VNS+Rehab | 177.3 | 48.4 | 89.9 | 114.8 | 137.5 | 137.5 | 164.4 | 155.1 |
| 11 | VNS+Rehab | 168.1 | 48.7 | 127.2 | 149.4 | 165.9 | 171.8 | 172.0 | 146.3 |
| 12 | VNS+Rehab | 138.7 | 56.1 | 84.1 | 138.0 | 147.8 | 155.1 | 137.0 | 123.5 |
| 13 | VNS+Rehab | 152.8 | 66.1 | 97.3 | 145.1 | 169.0 | 172.4 | 160.5 | 167.6 |
| 14 | VNS+Rehab | 140.5 | 68.3 | 95.6 | 135.3 | 128.8 | 130.0 | 148.0 | 146.4 |
| 15 | VNS+Rehab | 175.1 | 42.7 | 62.2 | 84.8 | 136.4 | 137.8 | 152.2 | 127.1 |
| 16 | VNS+Rehab | 146.1 | 54.6 | 110.9 | 148.7 | 149.9 | 146.7 | 156.4 | 123.5 |
| 17 | VNS+Rehab | 148.7 | 68.3 | 66.2 | 161.3 | 135.1 | 162.6 | 152.2 | 160.0 |
| 18 | VNS+Rehab | 134.3 | 69.3 | 111.5 | 139.0 | 127.1 | 100.1 | 97.2 | 105.6 |
| All forces in grams | | | | | | | | | |

**Table 2. Hit Rate at each Week**

| **Animal ID** | **Group** | **Wk -1** | **Wk 8** | **Wk 9** | **Wk 10** | **Wk 11** | **Wk 12** | **Wk 13** | **Wk 14** |
| --- | --- | --- | --- | --- | --- | --- | --- | --- | --- |
| 1 | Rehab | 85.3% | 0.1% | 0.0% | 0.4% | 2.1% | 9.0% | 25.2% | 40.4% |
| 2 | Rehab | 88.5% | 0.0% | 0.4% | 2.3% | 8.2% | 23.6% | 42.8% | 41.2% |
| 3 | Rehab | 79.1% | 25.2% | 75.8% | 87.4% | 79.5% | 64.4% | 63.8% | 55.2% |
| 4 | Rehab | 87.2% | 11.9% | 15.4% | 58.2% | 34.6% | 18.0% | 3.6% | 3.8% |
| 5 | Rehab | 91.7% | 20.1% | 45.7% | 40.1% | 21.6% | 10.9% | 2.3% | 13.5% |
| 6 | Rehab | 79.7% | 3.4% | 39.2% | 56.9% | 75.3% | 72.1% | 61.5% | 60.5% |
| 7 | Rehab | 83.4% | 4.1% | 8.9% | 20.3% | 50.8% | 64.3% | 52.4% | 48.5% |
| 8 | Rehab | 82.5% | 0.0% | 3.9% | 31.5% | 34.4% | 35.2% | 30.6% | 33.5% |
| 9 | VNS+Rehab | 80.2% | 15.4% | 35.1% | 46.2% | 56.1% | 64.2% | 72.5% | 68.1% |
| 10 | VNS+Rehab | 94.3% | 5.1% | 66.5% | 82.6% | 74.3% | 76.5% | 74.8% | 84.8% |
| 11 | VNS+Rehab | 92.8% | 5.6% | 46.8% | 71.1% | 88.5% | 90.3% | 91.2% | 87.6% |
| 12 | VNS+Rehab | 75.5% | 17.4% | 48.1% | 65.3% | 83.8% | 82.5% | 91.5% | 83.2% |
| 13 | VNS+Rehab | 88.8% | 24.2% | 85.7% | 85.2% | 89.5% | 86.1% | 89.9% | 93.0% |
| 14 | VNS+Rehab | 75.1% | 17.6% | 37.5% | 66.0% | 60.4% | 60.7% | 74.1% | 78.2% |
| 15 | VNS+Rehab | 92.8% | 0.0% | 1.7% | 15.7% | 77.0% | 83.3% | 72.2% | 61.4% |
| 16 | VNS+Rehab | 85.2% | 5.9% | 42.4% | 80.2% | 80.5% | 80.7% | 81.8% | 54.9% |
| 17 | VNS+Rehab | 77.0% | 17.6% | 23.8% | 71.8% | 57.4% | 70.0% | 73.2% | 67.1% |
| 18 | VNS+Rehab | 78.1% | 16.4% | 23.3% | 65.0% | 70.5% | 62.4% | 58.9% | 66.1% |

**Table 3. Cylinder Total Contacts**

| **Animal ID** | **Group** | **Wk -1** | **Wk 8** | **Wk 14** |
| --- | --- | --- | --- | --- |
| 1 | Rehab | 113 | 42 | 67 |
| 2 | Rehab | 79 | 31 | 38 |
| 3 | Rehab | 85 | 24 | 16 |
| 4 | Rehab | 173 | 11 | 25 |
| 5 | Rehab | 95 | 18 | 31 |
| 6 | Rehab | 67 | 27 | 26 |
| 7 | Rehab | 75 | 7 | 24 |
| 8 | Rehab | 69 | 11 | 19 |
| 9 | VNS+Rehab | 126 | 23 | 98 |
| 10 | VNS+Rehab | 108 | 9 | 65 |
| 11 | VNS+Rehab | 75 | 7 | 63 |
| 12 | VNS+Rehab | 84 | 16 | 65 |
| 13 | VNS+Rehab | 81 | 19 | 57 |
| 14 | VNS+Rehab | 91 | 25 | 68 |
| 15 | VNS+Rehab | 84 | 30 | 76 |
| 16 | VNS+Rehab | 101 | 33 | 44 |
| 17 | VNS+Rehab | 50 | 16 | 97 |
| 18 | VNS+Rehab | 113 | 3 | 77 |

**Table 4. Grip Strength**

|  |  | **Right Paw** | | | **Left Paw** | | |
| --- | --- | --- | --- | --- | --- | --- | --- |
| **Animal ID** | **Group** | **Wk -1** | **Wk 8** | **Wk 14** | **Wk -1** | **Wk 8** | **Wk 14** |
| 1 | Rehab | 638.4 | 252.1 | 308.8 | 654.2 | 259.1 | 248.8 |
| 2 | Rehab | 591.1 | 309.3 | 362.4 | 581.5 | 321.4 | 332.7 |
| 3 | Rehab | 720.4 | 289.7 | 319.6 | 701.1 | 270.4 | 291.6 |
| 4 | Rehab | 608.1 | 254.0 | 382.4 | 605.4 | 289.4 | 355.4 |
| 5 | Rehab | 627.1 | 342.7 | 454.1 | 674.5 | 354.2 | 382.7 |
| 6 | Rehab | 715.4 | 259.4 | 350.0 | 727.3 | 268.4 | 295.9 |
| 7 | Rehab | 729.0 | 321.1 | 403.9 | 700.8 | 401.3 | 425.1 |
| 8 | Rehab | 694.1 | 282.4 | 368.5 | 687.6 | 273.4 | 285. |
| 9 | VNS+Rehab | 719.4 | 276.1 | 503.5 | 704.4 | 258.5 | 355.4 |
| 10 | VNS+Rehab | 613.1 | 288.1 | 435.8 | 591.4 | 304.5 | 389.4 |
| 11 | VNS+Rehab | 664.6 | 234.3 | 402.6 | 684.3 | 197.7 | 319.2 |
| 12 | VNS+Rehab | 609.1 | 313.4 | 591.6 | 628.9 | 335.7 | 404.4 |
| 13 | VNS+Rehab | 727.8 | 349.5 | 546.6 | 724.9 | 381.1 | 487.7 |
| 14 | VNS+Rehab | 564.5 | 274.8 | 454.6 | 542.4 | 292.2 | 357.4 |
| 15 | VNS+Rehab | 571.6 | 243.8 | 468.0 | 578.4 | 221.1 | 501.1 |
| 16 | VNS+Rehab | 722.6 | 318.1 | 446.1 | 719.8 | 333.5 | 397.0 |
| 17 | VNS+Rehab | 521.8 | 291.3 | 368.3 | 502.9 | 307.4 | 424.6 |
| 18 | VNS+Rehab | 634.4 | 258.6 | 372.0 | 619.8 | 246.3 | 275.4 |

All forces in grams

**Table 5. Total Trials during Rehabilitative Training**

| **Animal ID** | **Group** |  |
| --- | --- | --- |
| 1 | Rehab | 11780 |
| 2 | Rehab | 8897 |
| 3 | Rehab | 14386 |
| 4 | Rehab | 12446 |
| 5 | Rehab | 12432 |
| 6 | Rehab | 8720 |
| 7 | Rehab | 9472 |
| 8 | Rehab | 9813 |
| 9 | VNS+Rehab | 8766 |
| 10 | VNS+Rehab | 10573 |
| 11 | VNS+Rehab | 7863 |
| 12 | VNS+Rehab | 9546 |
| 13 | VNS+Rehab | 12050 |
| 14 | VNS+Rehab | 10606 |
| 15 | VNS+Rehab | 11298 |
| 16 | VNS+Rehab | 6686 |
| 17 | VNS+Rehab | 8363 |
| 18 | VNS+Rehab | 8149 |
